# Supplementary material for: Electrophysiological fingerprints of OFF bipolar cells in rat retina
Source: PubMed Central journal article supplement (PMC4960551; doi:10.1038/srep30259), 2016-07-26
Supplement: srep30259-s1.pdf [file srep30259-s1.pdf]

# **Electrophysiological fingerprints of OFF bipolar cells in rat retina**

Authors: Alex H. Vielma and Oliver Schmachtenberg

## **Supplementary Figures**

# Na<sup>+</sup>-currents

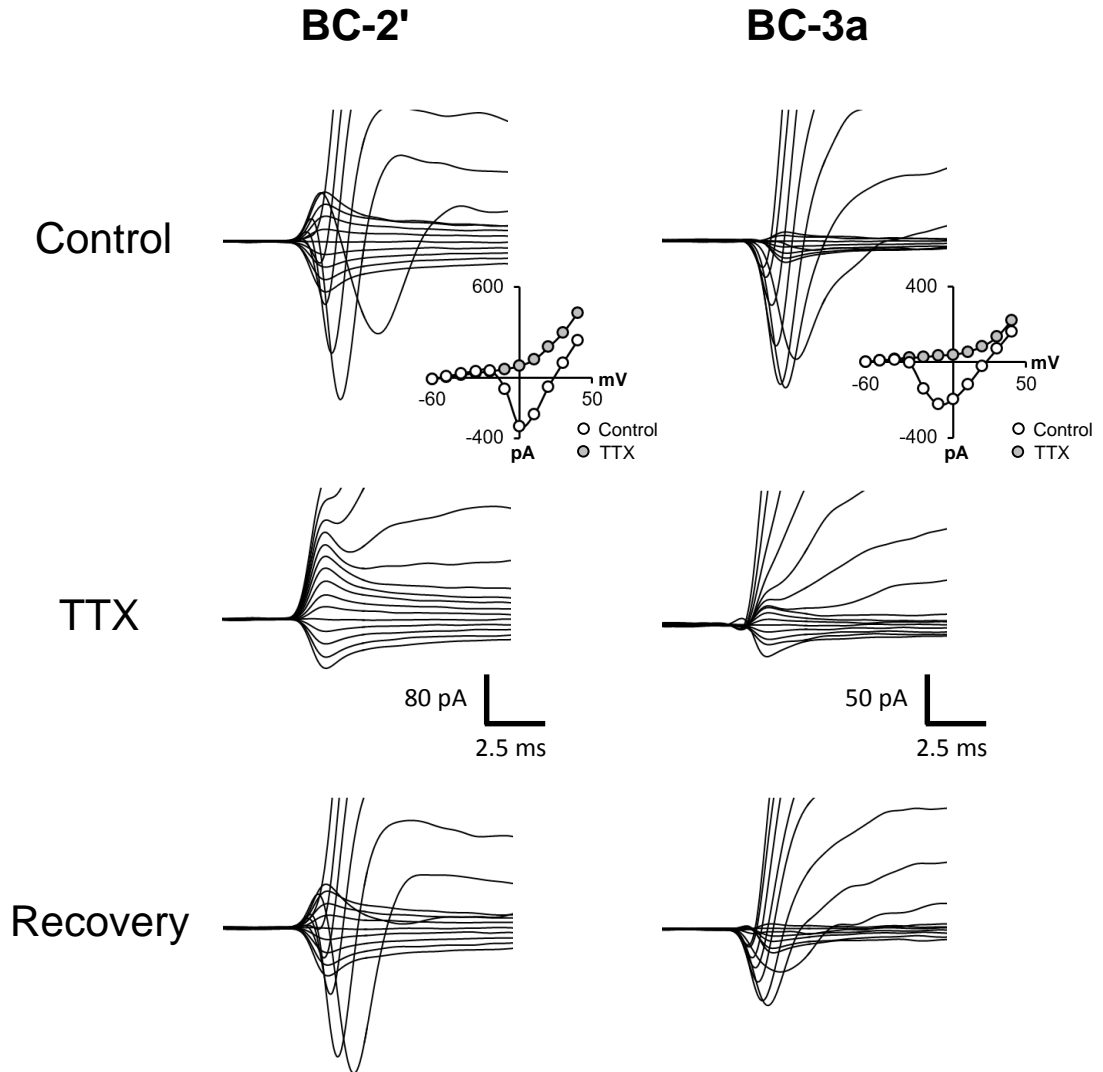

**Supplementary Figure S1. Na<sup>+</sup> currents in OFF BC types 2' and 3a.** Rapidly inactivating inward currents could be blocked by TTX, confirming their identity as Na<sup>+</sup> currents. The respective I-V relationships are shown below. Note recovery after drug washout.

## Inhibitory currents

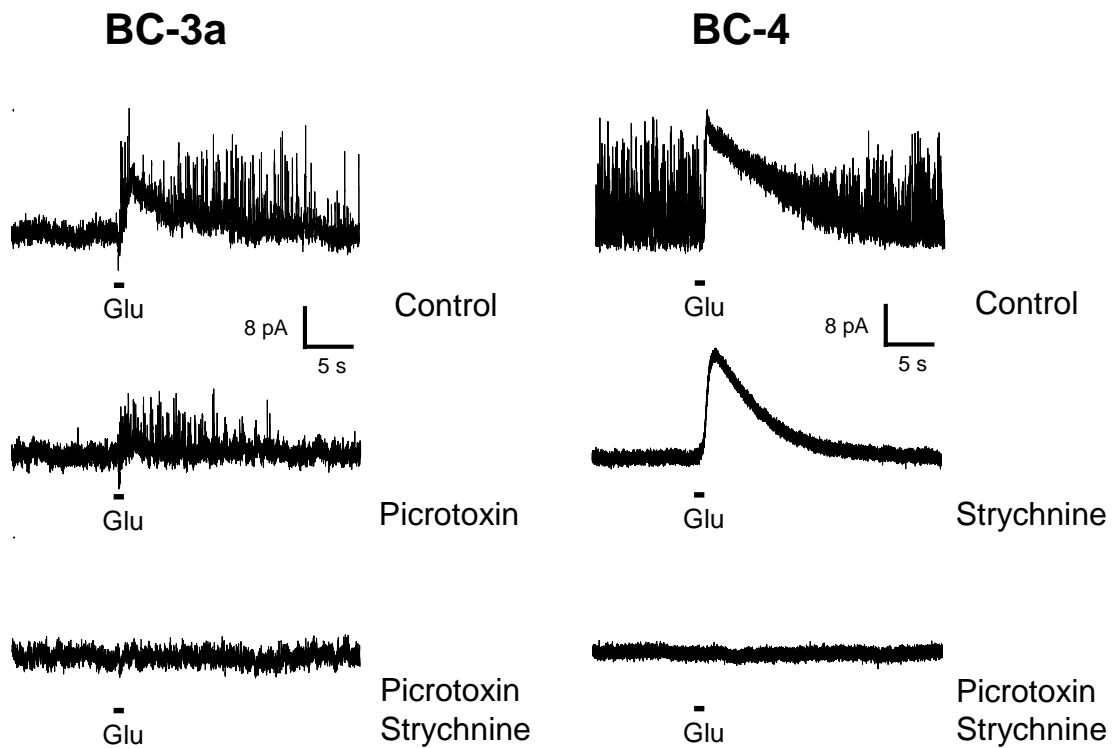

**Supplementary Figure S2. Inhibitory currents in OFF BCs.** Glutamate-evoked inhibitory currents in BC-3a and BC-4 were sensitive to the GABA receptor blocker picrotoxin and to the glycine receptor blocker strychnine.

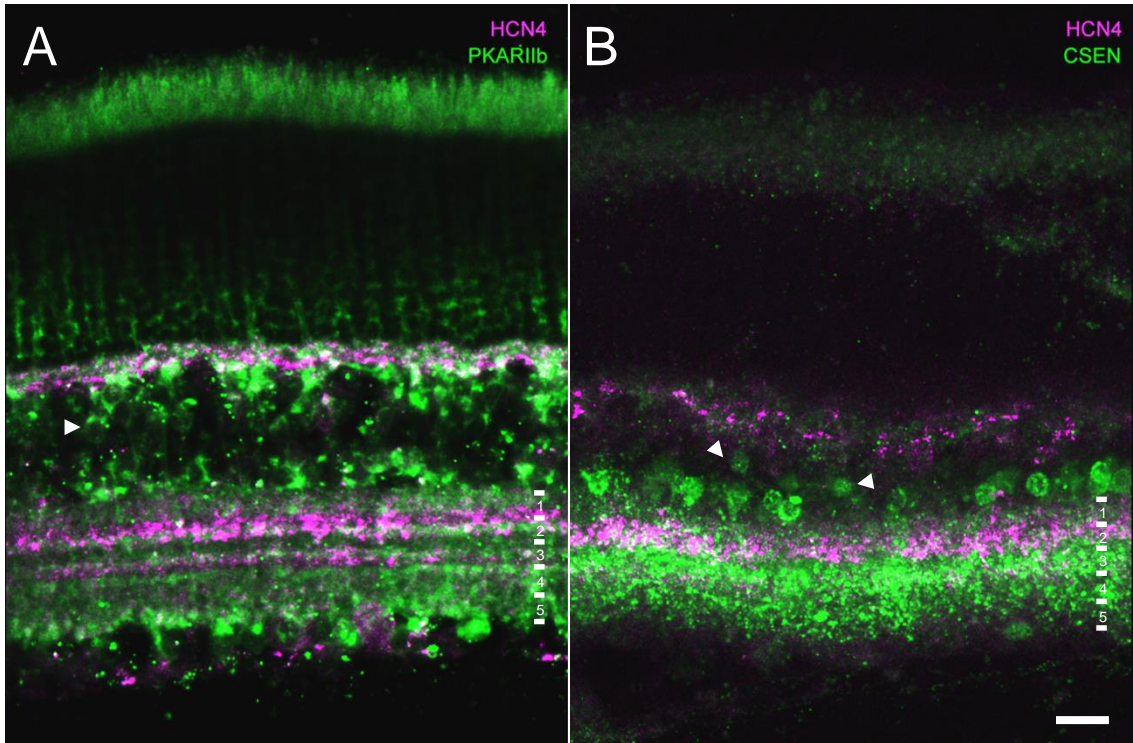

**Supplementary Figure S3. Immunohistochemical double labelling with BC markers established for mice <sup>15</sup>.** (A) HCN4 expression, a marker of BC-2 cells, revealed a punctate pattern in both the OPL and IPL. Two separate bands in the IPL were evident in some preparations. PKARII $\beta$  immunoreactivity, labelling BC-3b in mice, was present in cell bodies in the outer INL (arrowhead). However, photoreceptors, amacrine and ganglion cells were also partly PKARII $\beta$ -positive. (B) Calnenilin (CSEN) immunoreactivity, which marks BC-4 in mice, was observed throughout the IPL, in amacrine cell bodies and in cell bodies in the outer INL (arrowheads). There was no co-localization of HCN4 with PKARII $\beta$  or CSEN. Scale bar: 20  $\mu$ m.

## Ca<sup>2+</sup>-currents

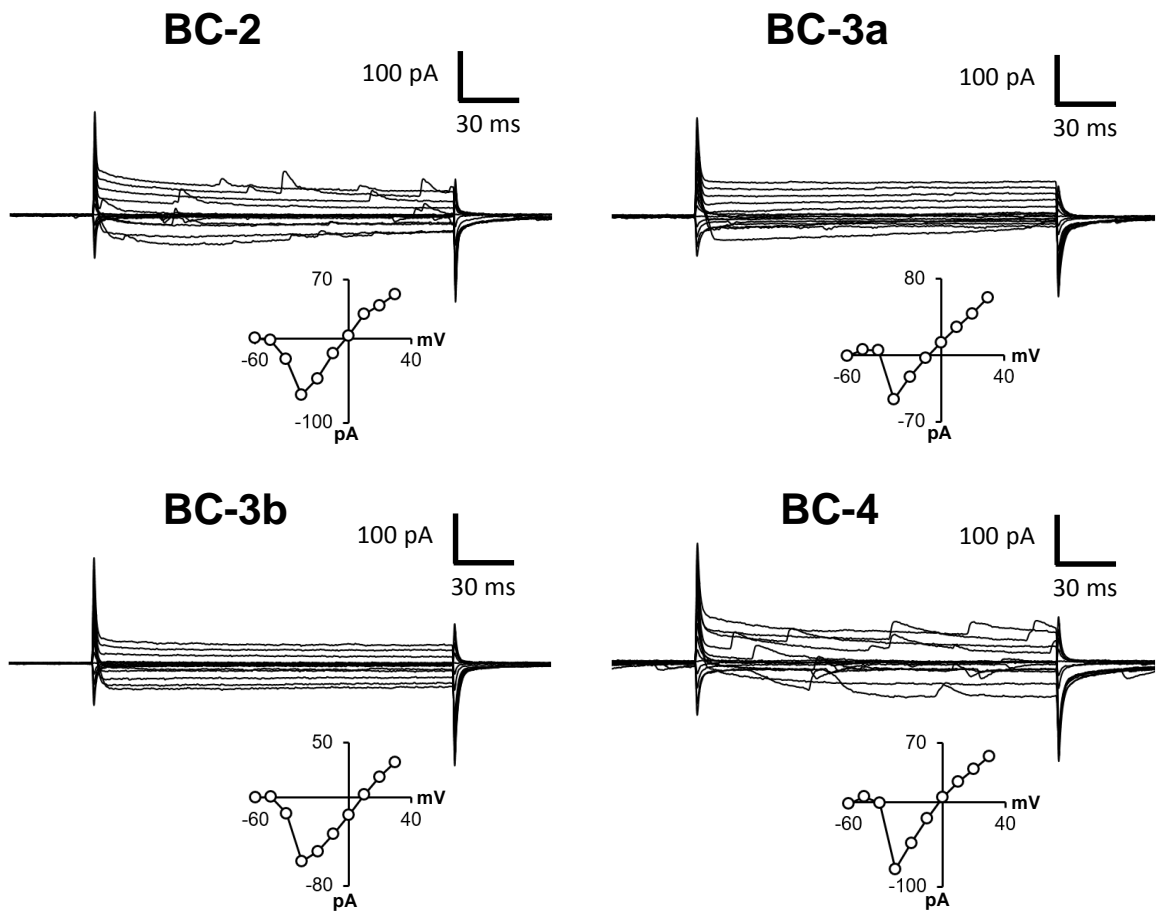

**Supplementary Figure S4. Ca<sup>2+</sup> currents in OFF BCs.** Blockage of K<sup>+</sup> currents with Cs<sup>+</sup> and TEA unmasks the presence of Ca<sup>2+</sup> currents in representative examples of BC-2, 3a, 3b and 4. The respective I-V relationships are shown below.
